# Supplementary material
Source: PubMed Central journal article supplement (PMC3102216)

Figure S1A

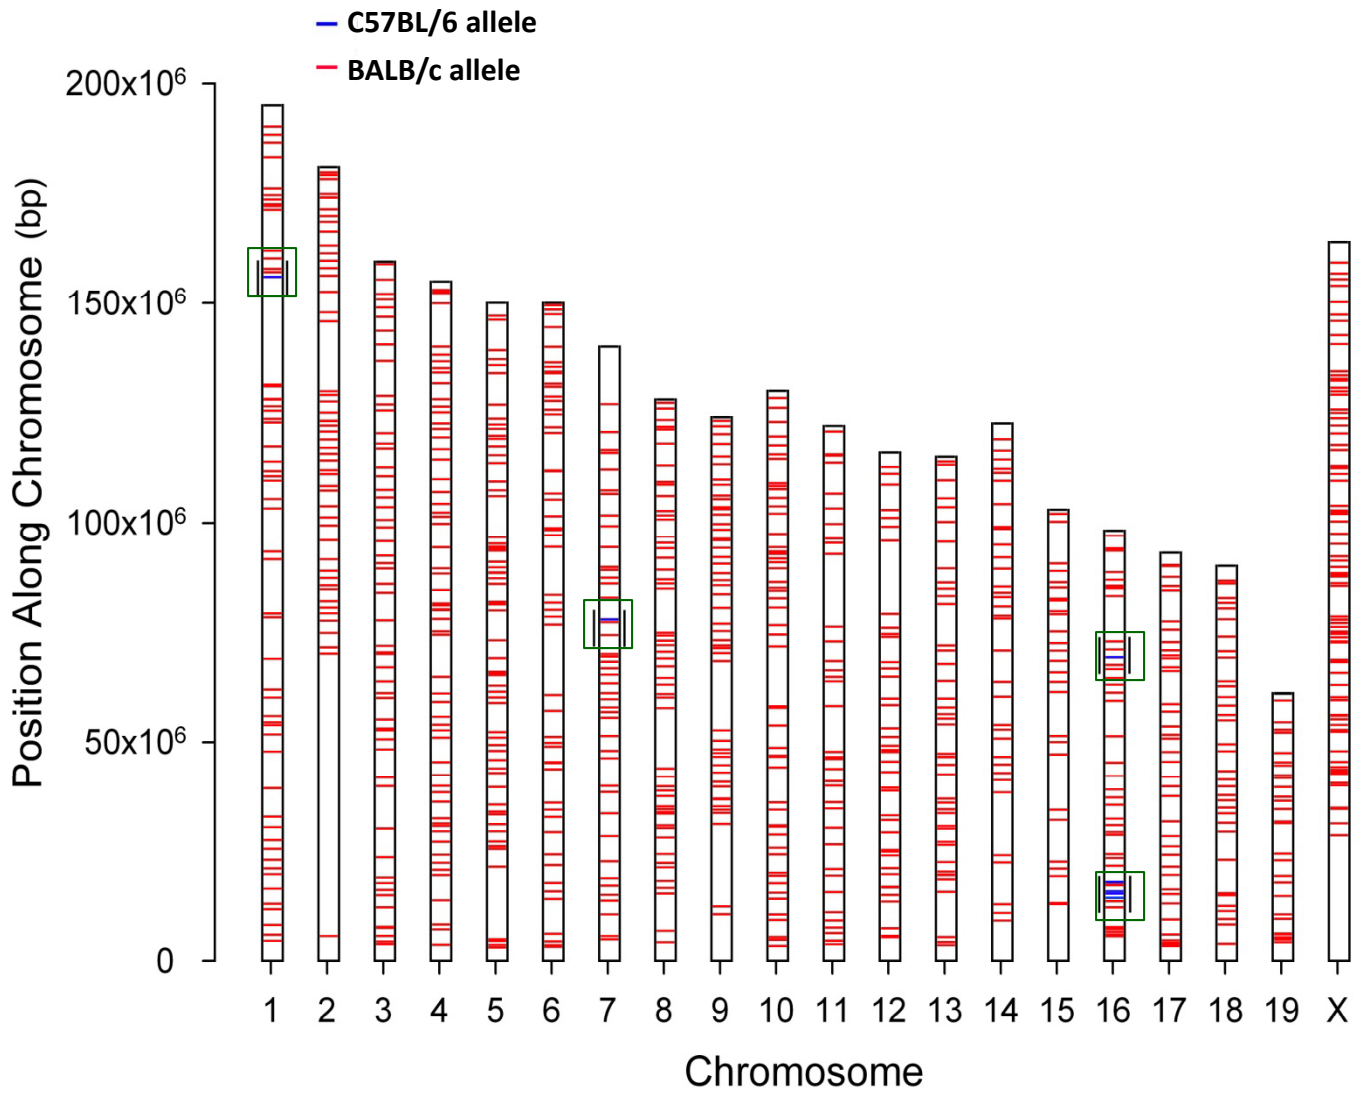

**Figure S1B**

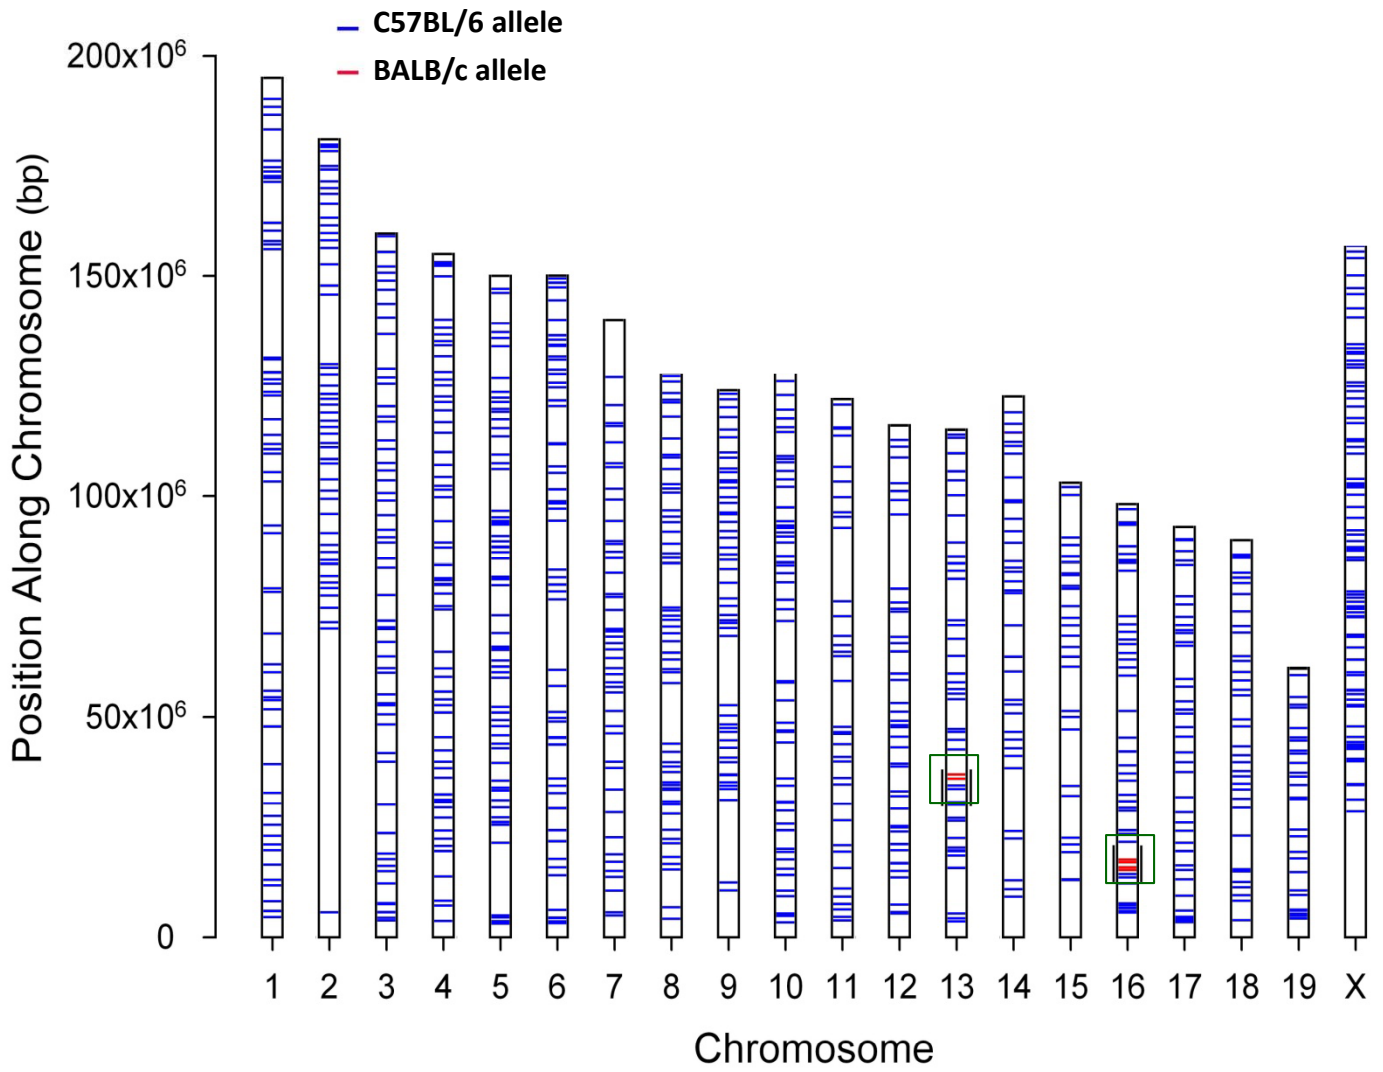

Figure S2

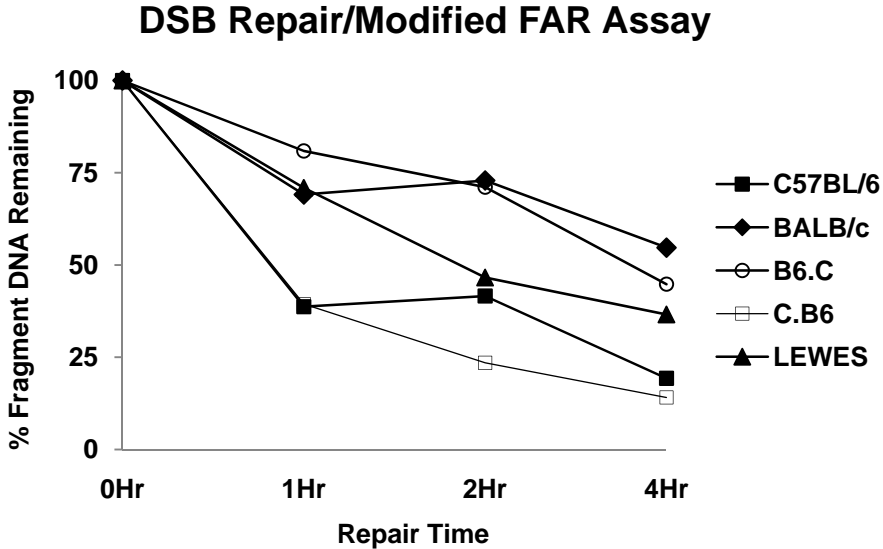

Figure S3

### Clonogenic Survival of Mouse Primary Kidney Fibroblasts

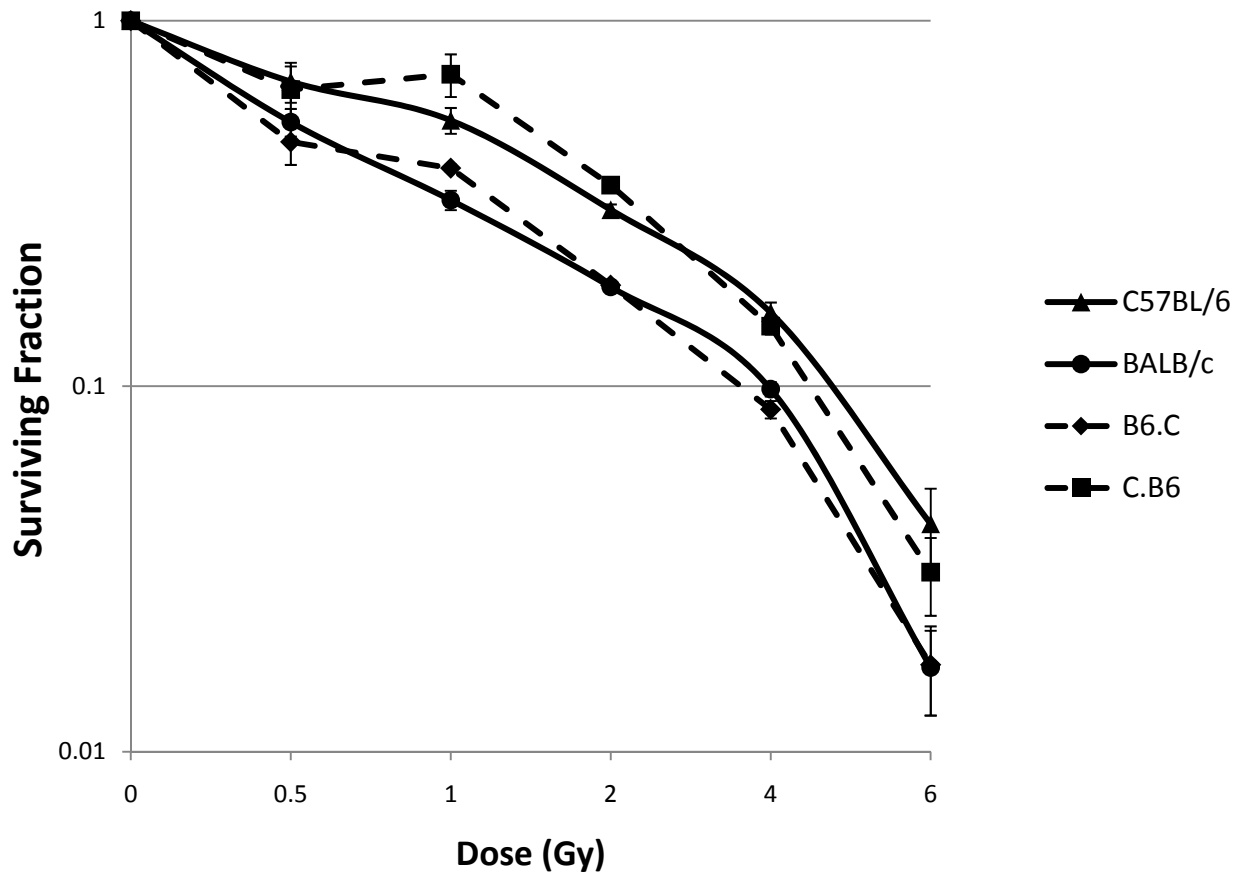

Supplement: NIHMS286192-supplement-Supplemental_Figures.pdf [file NIHMS286192-supplement-Supplemental_Figures.pdf]
